# Supplementary material for: No association of the common Asian mitochondrial DNA haplogroups with lung cancer in East Indian population
Source: publisher site journal article supplement (doi:10.1515/jbcpp-2021-0352), 2022-03-26
Supplement: Supplementary file 1 [file j_jbcpp-2021-0352_suppl_001.pdf]

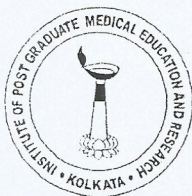

Institute of Post Graduate Medical Education & Research  
244, A.J.C. Bose Road, Kolkata – 700020.  
**IPGME&R Research Oversight Committee**  
(Institutional Ethics Committee)

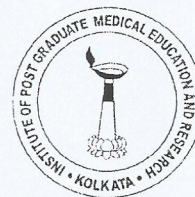

Memo No. Inst/IEC/2015/545

Date: 10.12.2015

**Dr. Mainak Sengupta**  
Assistant Professor  
Department of Genetics  
University of Calcutta  
Kolkata

Dear Dr. Sengupta,

A meeting of the Institutional Ethics Committee of IPGME&R, Kolkata, was held on 05.12.2015 at 12:00 Noon in the IPGME&R Dean's Office. In this meeting, the members considered the protocol of your project titled:

**Studies on the role of regulatory variants of the genes involved in xenobiotic metabolism and DNA repair in conferring differential susceptibility to or protection against cigarette smoke induced lung carcinogenesis in Indian context.**

The following additional documents were reviewed:

- Informed consent documents in English.
- Informed consent documents in Hindi.
- Informed consent documents in Bengali.

After deliberations and review the committee took the following decision regarding the above documents:

**Approved**

You may therefore go along with the project in its present form. It is placed on record that the decision regarding your proposal was unanimous and therefore did not require any voting procedure.

The Committee understands that from IPGME&R, Kolkata, the Co-Investigator for your project would be Dr. Ritabrata Mitra, Assistant Professor, Department of Pulmonary (Chest) Medicine.

The list of committee members present in this meeting are appended to this page.

Additional points, if any, stated on the next page are to be noted.

Continued on Page 2



UNIVERSITY OF CALCUTTA

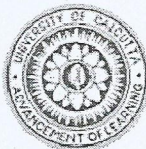

PHONE : { 2350-1397  
2350-6387  
2350-6396  
2350-8386

Fax No. : 91-033-2351-9755  
Website: [www.caluniv.ac.in](http://www.caluniv.ac.in)

E-mail : [amitraycu@yahoo.com](mailto:amitraycu@yahoo.com)  
[aray@caluniv.ac.in](mailto:aray@caluniv.ac.in)

**Dr. Amit Ray , M.Sc, Ph.D.**

Secretary,

Faculty Councils for Post-Graduate Studies in Science

Technology & Engineering, Agriculture & Veterinary Science,

University of Calcutta

Ref No....0024/16-17/1434

92, ACHARYA PRAFULLA CHANDRA ROAD,  
KOLKATA-700 009

Dated...24.10.2016....

**INSTITUTIONAL ETHICAL CLEARENCE CERTIFICATE**

TO WHOM IT MAY CONCERN

The project proposal submitted by Dr. Mainak Sengupta, Associate Professor , Principal Investigator, Dept. of Genetics,, C.U. and ( Dr.) Ritabrata Mitra , Co-Principal Investigator , Department of Genetics, C.U. for approval on the project entitled “ **Studies on the role of regulatory variants of the genes involved in xenobiotic metabolism and DNA in conferring differential susceptibility to or protection against cigarette smoke induced lung carcinogenesis in Indian context.**” was placed before the Ethical Committee in its meeting dated 14<sup>th</sup> September, 2016 vides Item No. 16 and resolved as follows:

*“Resolved that the ethical clearance of the project be approved and ICMR guidelines to be followed for implementation”.*

Date : ...24.10.2016..

Member Secretary  
Institutional Ethical Committee  
University of Calcutta &  
Secretary, UCSTA,C.U.



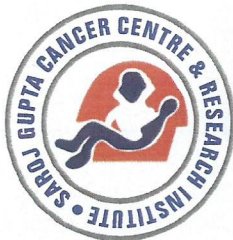

# INSTITUTIONAL ETHICS COMMITTEE *Of* **SAROJ GUPTA CANCER CENTRE & RESEARCH INSTITUTE**

Mahatma Gandhi Road, Thakurpukur, Kolkata - 700 063

Ph. : 91-33-2467 8001 / 8003; 2453 2781 / 82 / 83 & 2438 3001 / 3145, Fax : 91-33-2467 8002 / 2453 6711  
e-mail : cancerwelfare@yahoo.co.in, cancercentre6@gmail.com, Website : www.cancercentrecalcutta.org

11<sup>th</sup> October 2017

IEC SGCCRI REF NO- 2017/MS/ 1

**Dr. Mainak Sengupta**  
University of Calcutta

**Subject: Studies on the role of regulatory variants of the genes involved in xenobiotic metabolism and DNA repair in conferring differential susceptibility to or protection against cigarette smoke induced lung carcinogenesis in Indian context . The study was presented by Dr. Mainak Sengupta (University of Calcutta):**

The following members were present at the meeting held on 1-09-2017:

- Honb'le Justice ( Retd) Ajit Kumar Nayak - Chairperson
- Dr. Saradindu Ghosh – Member Secretary
- Dr. Arnab Gupta – Clinician
- Prof. Santanu Tripathi – Basic Medical Scientist & Pharmacologist
- Mr. Krishnendu Halder -- Legal Expert
- Prof. Dipak Kr Nath – Social Scientist
- Nupur Chakraborty – Lay Person
- Prof. Susanta Roychowdhury – Basic Medical Scientist
- Dr. Samir Bhattacharyya – Clinician
- Dr. Madhuchanda Kar – Clinician
- Ms Debjani Aich – Lay Person
- Dr. Chinmoy Panda – Invited Member as a subject specialist



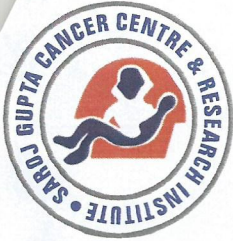

**INSTITUTIONAL ETHICS COMMITTEE**  
*Of*  
**SAROJ GUPTA CANCER CENTRE & RESEARCH INSTITUTE**

Mahatma Gandhi Road, Thakurpukur, Kolkata - 700 063

Ph. : 91-33-2467 8001 / 8003; 2453 2781 / 82 / 83 & 2438 3001 / 3145, Fax : 91-33-2467 8002 / 2453 6711  
e-mail : cancerwelfare@yahoo.co.in, cancercentre6@gmail.com, Website : www.cancercentrecalcutta.org

On interrogation the PI stated that the tissues will be taken from cancer patients with smoking history from SGCCRI and the tissues from non cancer patients will be recruited from other general hospitals. The IEC being satisfied considered this study to be passed.

Yours sincerely,

Dr Saradindu Ghosh  
Member Secretary,  
Institutional Ethics Committee,  
Saroj Gupta Cancer Centre and Research Institute,  
Mahatma Gandhi Road, Thakurpukur,  
Kolkata 700063
